# Supplementary material for: Modulating oxygen vacancies of CeO2 nanospheres by Zn-doping: an efficient electrocatalyst for N2 reduction under ambient conditions
Source: Royal Society of Chemistry journal article supplement (doi:10.1039/d2ya00241h), 2022-01-01
Supplement: d2ya00241h1.pdf [file d2ya00241h1.pdf]

# **Modulating oxygen vacancies of CeO<sub>2</sub> nanospheres by Zn-doping: an efficient electrocatalyst for N<sub>2</sub> reduction under ambient conditions**

Yuyao Ji,<sup>a§</sup> MIngyu Yang,<sup>a§</sup> Wendong Cheng,<sup>a</sup> Chengbo Li<sup>b</sup> and Xingquan Liu<sup>a\*</sup>

<sup>a</sup>School of Materials and Energy, University of Electronic Science and Technology of China, Chengdu 610054, China.

<sup>b</sup>College of Chemistry and Materials Science, Sichuan Normal University, Chengdu 610068, China.

## **Content:**

|                                         |     |
|-----------------------------------------|-----|
| Supplementary Experimental Section..... | S2  |
| Supplementary Figures.....              | S5  |
| Supplementary Tables.....               | S12 |
| References.....                         | S13 |

## Experimental section

**Materials:** Cerous(III) nitrate hexahydrate, cerium oxide, and cobalt (II) nitrate hexahydrate were purchased from Beijing Chemical Corporation. Nickel (II) nitrate hexahydrate, copper (II) nitrate trihydrate zinc nitrate hexahydrate, and sodium hydroxide pellets were procured from Beijing Chemical Corporation. Absolute ethanol was procured from Changshu Hongsheng Fine Chemical Co. Ltd. China. Distilled water was produced in our laboratory through a distillation unit.

**Preparation of Zn-CeO<sub>2</sub>:** The preparation process of the Zn-CeO<sub>2</sub> composite is as follows: 2 mmol Ce(NO<sub>3</sub>)<sub>3</sub>·6H<sub>2</sub>O and 0.2 mmol metal precursor Zn were dissolved in 5 mL of distilled H<sub>2</sub>O in a 50 mL Teflon-lined stainless-steel autoclave. Then, 9 g of NaOH was dissolved in 30 mL of distilled H<sub>2</sub>O and added dropwise to the above solution under constant stirring and continued agitation for 20 min. Then, Teflon lined stainless-steel high-pressure reactor was fully tightened and kept at 95 °C for 24 h in an oven (for the synthesis of cube morphology, the autoclave was kept at 180 °C for 24 h). The reactor was allowed to cool to room temperature and the catalyst was washed numerous times with H<sub>2</sub>O and then ethanol until the pH reached 7. The resulting catalyst was dried at 80 °C for 10 h and then calcined at 600 °C @ 5 °C min<sup>-1</sup> for 5 h under static air. Pure CeO<sub>2</sub> and ZnO catalysts were prepared by a similar procedure.

**Preparation of Zn-CeO<sub>2</sub> electrode:** 10 mg Zn-CeO<sub>2</sub> powders and 40 µL of Nafion solution (5 wt%) were dispersed in 960 µL mixed solution containing 720 µL ethanol and 240 µL H<sub>2</sub>O by 2 h sonication to form a homogeneous ink. Then, 10 µL Zn-CeO<sub>2</sub> was loaded on a CP with area of 1 x 1 cm<sup>2</sup> and dried under ambient condition.

**Characterizations:** XRD patterns were obtained from a Shimazu XRD-6100 diffractometer with Cu K $\alpha$  radiation (40 kV, 30 mA) of wavelength 0.154 nm (Japan). SEM images were collected from the tungsten lamp-equipped SU3500 scanning electron microscope at an accelerating voltage of 20 kV (HITACHI, Japan). TEM images were obtained from a Zeiss Libra 200FE transmission electron microscope operated at 200 kV. XPS measurements were performed on an ESCALABMK II X-ray photoelectron spectrometer using Mg as the exciting source. The UV-Vis absorbance spectra were measured on a SHIMADZU UV-1800 UV-Vis

spectrophotometer, energy dispersive X-ray analysis (EDX), and the Brunner–Emmet–Teller method (BET, ASAP 2020, Micromeritics).

**Electrochemical measurements:** Before NRR measures, the Nafion proton exchange film was pretreated by heating in 3% H<sub>2</sub>O<sub>2</sub> solution, 0.5 M H<sub>2</sub>SO<sub>4</sub> and ultrapure water at 80 °C for 1.5 h, respectively. Electrochemical measurements were carried out on a CHI 660E electrochemical analyzer (CHI Instruments, Inc., Shanghai) in a three-electrode system using Zn-CeO<sub>2</sub>/CP or CP as working electrode, Ag/AgCl as reference electrode, and graphite rod as counter electrode. All experiments were performed at ambient conditions. For N<sub>2</sub> reduction reaction experiments, the HCl electrolyte (0.1 M) was bubbled with high-purity N<sub>2</sub> (99.999%) for 30 min before measurement. All potentials reported in this work were calibrated to RHE, using the following equation:

$$E(\text{RHE}) = E(\text{Ag/AgCl}) + (0.197 + 0.059 \text{ pH}) \text{ V}$$

**Determination of NH<sub>3</sub>:** NH<sub>3</sub> concentration was determined by the indophenol blue method.<sup>1</sup> The method contains the following details: 2 mL HCl post-NRR electrolyte was collected from the cathodic chamber. Then, 2 mL of 1 M NaOH solution containing 5% salicylic acid and 5% sodium citrate was added into this solution. After mixing and standing at room temperature for 2 h, the UV-Vis absorption spectrum was measured at a wavelength of 655 nm. The concentration-absorbance curves were calibrated using standard NH<sub>4</sub>Cl solution (0.1 HCl solution as mother solution) with a series of concentrations. The fitting curve ( $y = 0.475x + 0.066$ ,  $R^2 = 0.999$ ) shows good linear relation of absorbance value with NH<sub>3</sub> concentration by three times independent calibrations.

**Determination of N<sub>2</sub>H<sub>4</sub>:** Concentration of N<sub>2</sub>H<sub>4</sub> in the electrolyte was estimated by the method of Watt and Chrisp.<sup>2</sup> Typically, a mixture solution containing p-C<sub>9</sub>H<sub>11</sub>NO (5.99 g), concentrated HCl (30 mL) and ethanol (300 mL) was used as a color reagent. In detail, 2 mL electrolyte removed from the cathodic chamber was added into 2 mL above prepared color reagent. After standing the mixture solution at room temperature for 20 min, UV-Vis absorption spectra were measured at a wavelength of 455 nm. The concentration-absorbance curves were calibrated using standard N<sub>2</sub>H<sub>4</sub> solutions with a series of concentrations for three

independent calibrations.

**Calculations of NH<sub>3</sub> yield and FE:** NH<sub>3</sub> yield was calculated using the following equations:

$$R_{\text{NH}_3} (\mu\text{g h}^{-1} \text{ mg}_{\text{cat.}}^{-1}) = (c_{\text{NH}_3} \times V) / (17 \times t \times m)$$

Where  $c_{\text{NH}_3}$  ( $\mu\text{g mL}^{-1}$ ) is the measured NH<sub>3</sub> concentration;  $V$  (mL) is the volume of electrolyte (in our work 35 mL);  $t$  (s or h) is the reaction time;  $A$  ( $\text{cm}^2$ ) is the geometric area of the cathode;  $m$  (mg) is the mass loading of catalyst on CP.

FE was calculated according to following equation:

$$\text{FE} = 3 \times F \times c_{\text{NH}_3} \times V / (17 \times Q) \times 100\%$$

Where  $F$  is Faraday constant ( $96500 \text{ C mol}^{-1}$ );  $Q$  (C) is the quantity of applied electricity.

**Computational details:** The spin polarization DFT is calculated by using photonic crystals. The plane wave based Vienna ab initio simulation software package (VASP) is extended Perdew Burke ernzerhof (PBE) functional gradient approximation method is used to describe the exchange related interactions between electrons.<sup>3</sup> Zn 2p and Ce 3d states are 3.5 eV and 2.0 eV, respectively. Van Der Waals (VDW) correction uses Grime method (DFT-D3) to analyze the interaction molecules/atoms and matrix among single factors.<sup>4</sup> The energy cutoff of the plane wave basis sets the expansion to 500 eV, and the atomic relaxation continues until the energy of the force acting on the atom is less than  $0.01 \text{ eV } \text{\AA}^{-1}$ . The surface of CeO<sub>2</sub> (101) was simulated using a 2×2 slab, there are four triple layers (O-Ce-O) on the top, and the triple layers at the bottom are fixed, with a vacuum interval of 15 Å. The Brillouin area has a sampling volume of 3×3×1. The central k-point grid, the width of the coating scheme in the electronic state using the Fermi model is 0.1 eV.

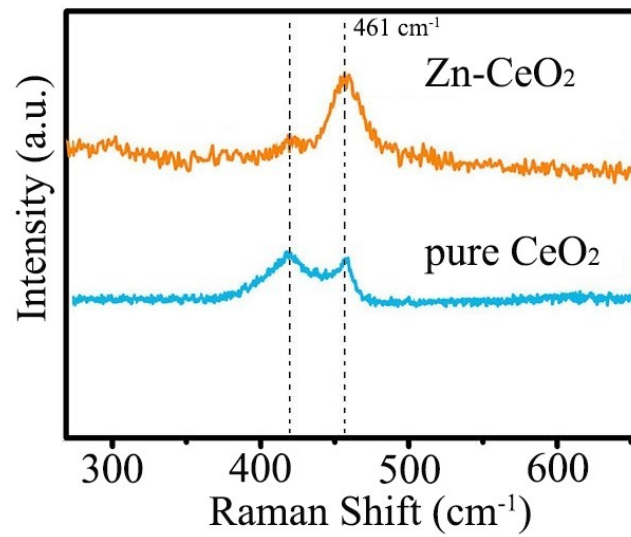

**Fig. S1.** Raman shift spectra of Zn-CeO<sub>2</sub> and pure CeO<sub>2</sub>.

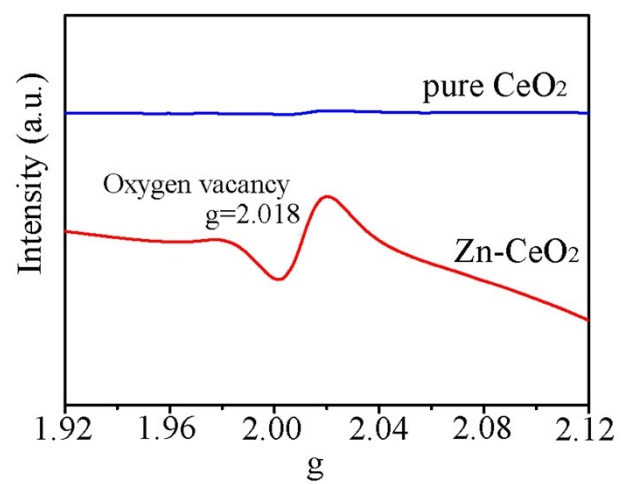

**Fig. S2.** Room-temperature ESR spectra of Zn-CeO<sub>2</sub> and pure CeO<sub>2</sub>.

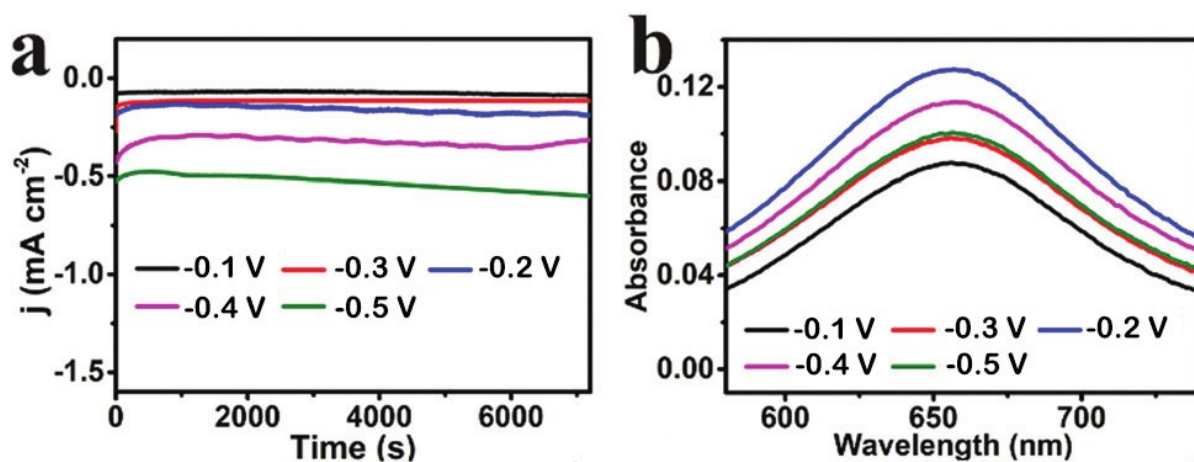

**Fig. S3.** (a) Chronoamperometry curves of Zn-CeO<sub>2</sub> in a 0.1 M Na<sub>2</sub>SO<sub>4</sub> solution at different potentials. (b) UV-Vis absorption spectra of the electrolytes stained with indophenol indicator after NRR electrolysis at different potentials for 2 h.

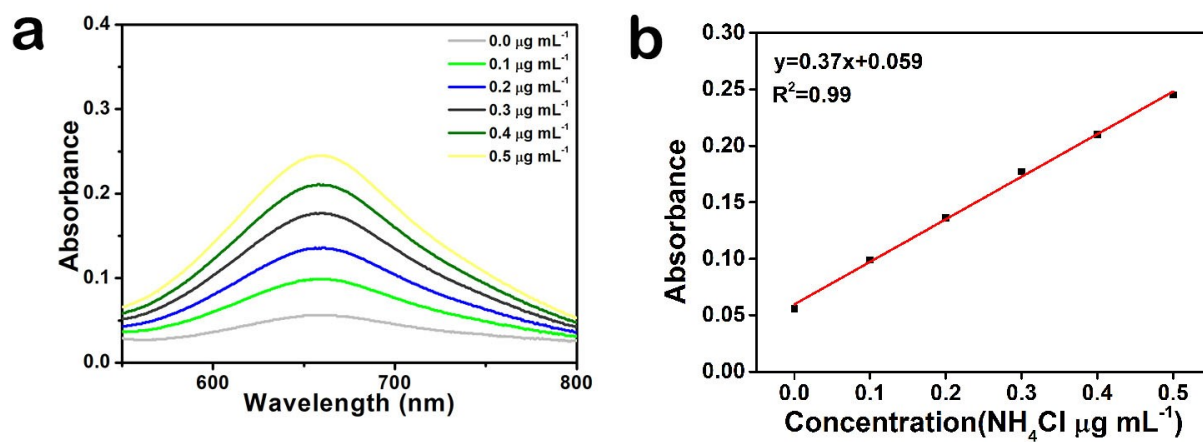

**Fig. S4.** (a) UV-Vis absorption spectra of indophenol assays with  $\text{NH}_4^+$  concentrations after incubated for 2 h at room temperature. (b) Calibration curve used for calculation of  $\text{NH}_4^+$  concentrations.



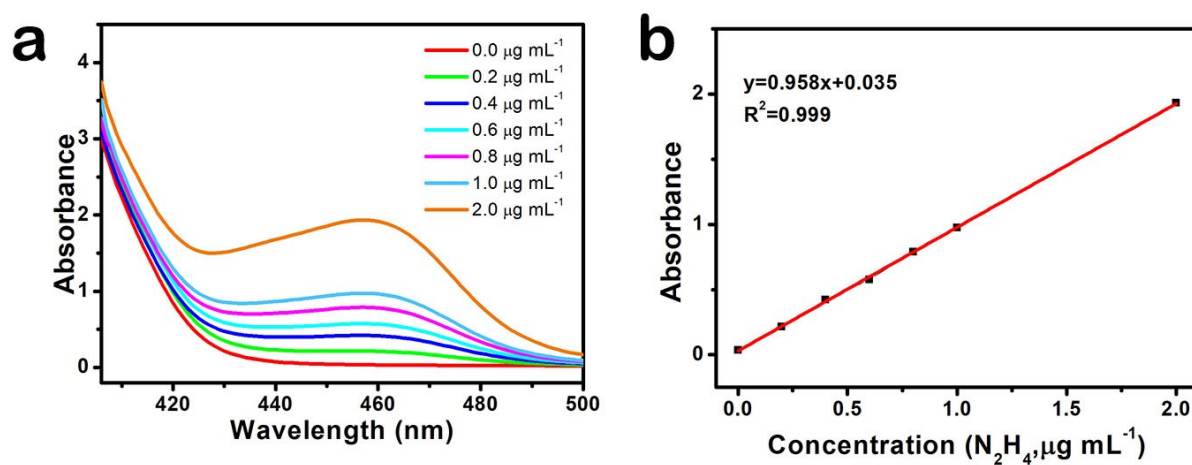

**Fig. S5.** (a) UV-Vis absorption spectra of various  $\text{N}_2\text{H}_4$  concentrations after incubated for 15 min at room temperature. (b) Calibration curve used for calculation of  $\text{N}_2\text{H}_4$  concentrations.

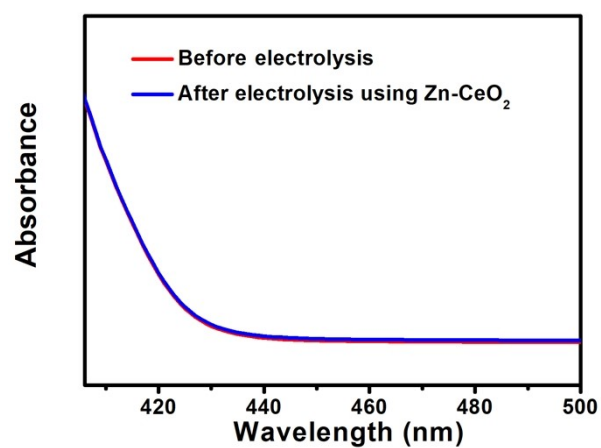

**Fig. S6.** UV-Vis absorption spectra of the electrolytes estimated by the method of Watt and Chrisp before and after 2 h electrolysis in N<sub>2</sub> atmosphere at  $-0.2$  V.

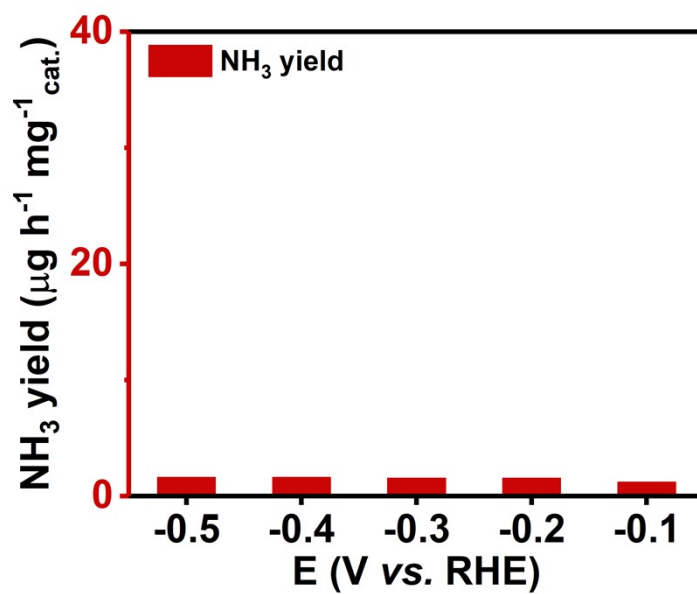

**Fig. S7.** The amount of  $\text{NH}_3$  detected in the Ar-saturated electrolyte at each potential.

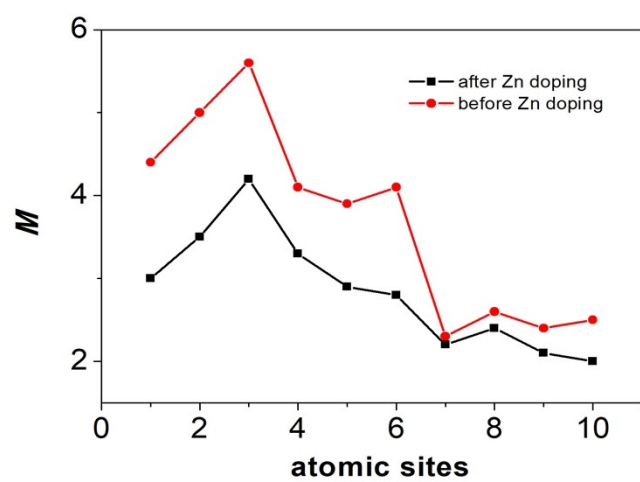

**Fig. S8.** Spin magnetic moment ( $M$  in  $\mu B$ ) of atomic sites before and after Zn doping.

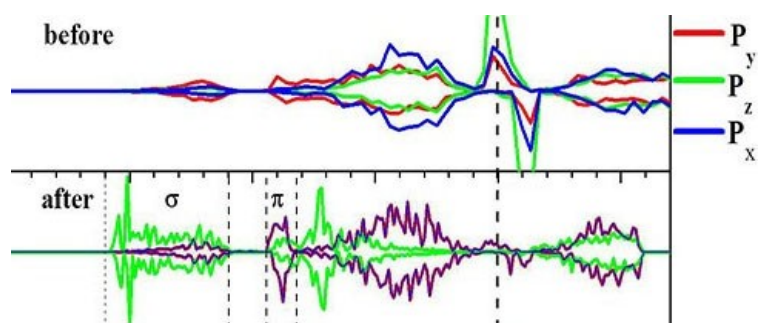

**Fig. S9.** DOS of Zn active site before and after  $N_2$  adsorption in  $CeO_2$  (111) surface.

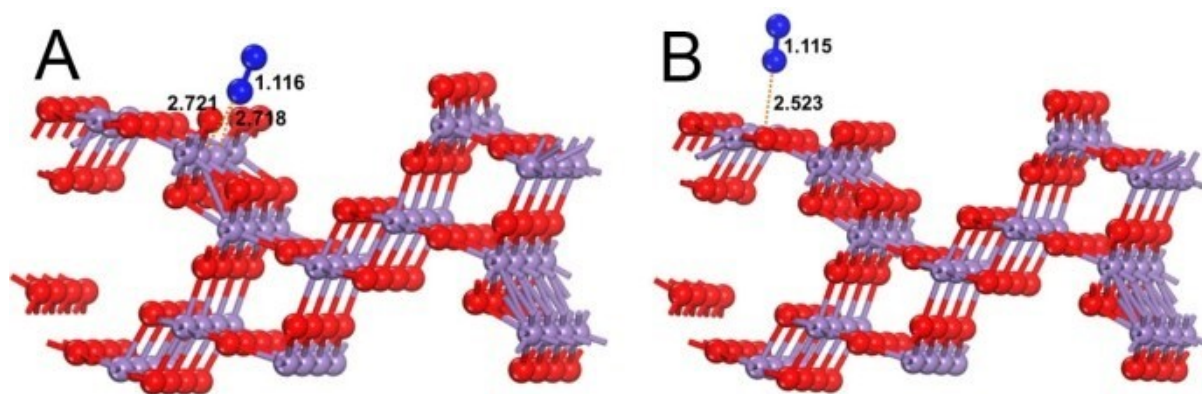

**Fig. S10.** Selected bond lengths (Å) are given. Red and blue isosurfaces (0.001 a.u.) represent charge accumulation and depletion, respectively.

**Table S1.** Comparison of electrocatalytic N<sub>2</sub> reduction performance for Zn-CeO<sub>2</sub> with other aqueous-based electrocatalysts under ambient conditions.

| Catalyst                                                         | Electrolyte                               | NH <sub>3</sub> yield rate<br>( $\mu\text{g h}^{-1} \text{mg}_{\text{cat.}}^{-1}$ ) | FE (%)        | Ref.             |
|------------------------------------------------------------------|-------------------------------------------|-------------------------------------------------------------------------------------|---------------|------------------|
| <b>Zn-CeO<sub>2</sub></b>                                        | <b>0.1 M Na<sub>2</sub>SO<sub>4</sub></b> | <b>29.01</b>                                                                        | <b>10.3</b>   | <b>This work</b> |
| $\alpha$ -Au/CeO <sub>x</sub> -RGO                               | -                                         | 8.3                                                                                 | 10.1          | 5                |
| TA-reduced Au/TiO <sub>2</sub>                                   | -                                         | 21.4                                                                                | 8.11          | 6                |
| MoN NA/CC                                                        | -                                         | 18.42                                                                               | 1.15          | 7                |
| MoO <sub>3</sub>                                                 | -                                         | 29.43                                                                               | 1.9           | 8                |
| VN/TM                                                            | -                                         | 5.14                                                                                | 2.25          | 9                |
| Bi <sub>4</sub> V <sub>2</sub> O <sub>11</sub> /CeO <sub>2</sub> | -                                         | 23.21                                                                               | 1.16          | 10               |
| Mo <sub>2</sub> N                                                | -                                         | 78.4                                                                                | 4.5           | 11               |
| NPC                                                              | 0.05 M H <sub>2</sub> SO <sub>4</sub>     | 23.8                                                                                | 1.42          | 12               |
| CuO/RGO                                                          | 0.1 M Na <sub>2</sub> SO <sub>4</sub>     | 11.02                                                                               | 3.9           | 13               |
| TiO <sub>2</sub> -rGO                                            | 0.1 M Na <sub>2</sub> SO <sub>4</sub>     | 15.13                                                                               | 3.3           | 14               |
| $\gamma$ -Fe <sub>2</sub> O <sub>3</sub>                         | 0.1 M KOH                                 | 0.212                                                                               | 1.9           | 15               |
| Fe <sub>2</sub> O <sub>3</sub> nanorods                          | 0.1 M Na <sub>2</sub> SO <sub>4</sub>     | 15.9                                                                                | 0.94          | 16               |
| Co-PCN                                                           | 0.1 M Na <sub>2</sub> SO <sub>4</sub>     | 49.69                                                                               | 32.2          | 17               |
| Ce-Bi <sub>2</sub> WO <sub>6</sub>                               | 0.1 M HCl                                 | 22.5                                                                                | 15.9          | 18               |
| Mo-W <sub>18</sub> O <sub>49</sub>                               | 0.1 M Na <sub>2</sub> SO <sub>4</sub>     | 5.3                                                                                 | 12.1          | 19               |
| FeSC                                                             | 0.1 M KOH                                 | 8.8 $\pm$ 1.3                                                                       | 6.1 $\pm$ 0.9 | 20               |
| h-BNNS                                                           | 0.1 M HCl                                 | 22.4                                                                                | 4.7           | 21               |
| Au NPs/CoOx                                                      | 0.05 M H <sub>2</sub> SO <sub>4</sub>     | 15                                                                                  | 19            | 22               |
| Fe-MoS <sub>2</sub>                                              | 0.05 M K <sub>2</sub> SO <sub>4</sub>     | 8.63                                                                                | 18.5          | 23               |

## References

- 1 D. Zhu, L. Zhang, R. E. Ruther and R. J. Hamers, Photo-illuminated diamond as a solid-state source of solvated electrons in water for nitrogen reduction. *Nat. Mater.*, 2013, **12**, 836–841.
- 2 G. W. Watt and J. D. Chrisp, Spectrophotometric method for determination of hydrazine. *Anal. Chem.*, 1952, **24**, 2006–2008.
- 3 G. Kresse and J. Furthmüller, Efficient iterative schemes for Ab initio total-energy calculations using a plane-wave basis set. *Phys. Rev. B.*, 1996, **54**, 11169.
- 4 S. Grimme, J. Antony, S. Ehrlich, H. Krieg, A consistent and accurate *ab initio* parametrization of density functional dispersion correction (DFT-D) for the 94 elements H-Pu. *J. Chem. Phys.*, 2010, **132**, 154104.
- 5 S. Li, D. Bao, M. Shi, B. Wulan, J. Yan and Q. Jiang, Amorphizing of Au nanoparticles by CeOx–RGO hybrid support towards highly efficient electrocatalyst for N<sub>2</sub> reduction under ambient conditions *Adv. Mater.*, 2017, **29**, 1700001.
- 6 M. Shi, D. Bao, B. Wulan, Y. Li, Y. Zhang, J. Yan and Q. Jiang, Au sub-nanoclusters on TiO<sub>2</sub> toward highly efficient and selective electrocatalyst for N<sub>2</sub> conversion to NH<sub>3</sub> at ambient conditions. *Adv. Mater.*, 2017, **29**, 1606550.
- 7 L. Zhang, X. Ji, X. Ren, Y. Luo, X. Shi, A. M. Asiri, B. Zheng and X. Sun, A novel strategy to synthesize Au nanoplates and their application for enzymeless H<sub>2</sub>O<sub>2</sub> detection. *ACS Sustainable Chem. Eng.*, 2018, **6**, 9550–9554.
- 8 J. Han, X. Ji, X. Ren, G. Cui, L. Li, F. Xie, H. Wang, B. Li and X. Sun, MoO<sub>3</sub> nanosheets for efficient electrocatalytic N<sub>2</sub> fixation to NH<sub>3</sub>. *J. Mater. Chem. A*, 2018, **6**, 12974–12977.
- 9 R. Zhang, Y. Zhang, X. Ren, G. Cui, A. M. Asiri, B. Zheng and X. Sun, High-efficiency electrosynthesis of ammonia with high selectivity under ambient conditions enabled by VN nanosheet array. *ACS Sustainable Chem. Eng.*, 2018, **6**, 9545–9549.
- 10 C. Lv, C. Yan, G. Chen, Y. Ding, J. Sun, Y. Zhou and G. Yu, An Amorphous Noble - Metal-free electrocatalyst that enables nitrogen fixation under ambient conditions *Angew. Chem., Int. Ed.*, 2018, **57**, 6073–6076.



- 11 X. Ren, G. Cui, L. Chen, F. Xie, Q. Wei, Z. Tian and X. Sun, Electrochemical N<sub>2</sub> fixation to NH<sub>3</sub> under ambient conditions: Mo<sub>2</sub>N nanorod as a highly efficient and selective catalyst. *Chem. Commun.*, 2018, **54**, 8474–8477.
- 12 Y. Liu, Y. Su, X. Quan, X. Fan, S. Chen, H. Yu, H. Zhao, Y. Zhang and J. Zhao, Facile ammonia synthesis from electrocatalytic N<sub>2</sub> reduction under ambient conditions on N-doped porous carbon. *ACS Catal.*, 2018, **8**, 1186–1191.
- 13 F. Wang, Y. Liu, H. Zhang and K. Chu, CuO/Graphene nanocomposite for nitrogen reduction reaction. *ChemCatChem*, 2019, **11**, 1441–1447.
- 14 X. Zhang, Q. Liu, X. Shi, A. M. Asiri, Y. Luo, X. Sun and T. Li, Zhang, TiO<sub>2</sub> nanoparticles-reduced graphene oxide hybrid: an efficient and durable electrocatalyst toward artificial N<sub>2</sub> fixation to NH<sub>3</sub> under ambient conditions. *J. Mater. Chem. A*, 2018, **6**, 17303–17306.
- 15 J. Kong, A. Lim, C. Yoon, J. Jang, H. Ham, J. Han, S. Nam, D. Kim, Y.-E. Sung, J. Choi and H. S. Park, Electrochemical synthesis of NH<sub>3</sub> at low temperature and atmospheric pressure using a Fe<sub>2</sub>O<sub>3</sub> catalyst. *ACS Sustainable Chem. Eng.*, 2017, **5**, 10986–10995.
- 16 X. Xiang, Z. Wang, X. Shi, M. Fan and X. Sun, Ammonia synthesis from electrocatalytic N<sub>2</sub> reduction under ambient conditions by Fe<sub>2</sub>O<sub>3</sub> nanorods. *ChemCatChem*, 2018, **10**, 4530–4535.
- 17 J. Yu, X. Ren, J. Lu, H. Bai, X. Wang, J. Hu and H. Huang, Cobalt doping of porous graphitic carbon nitride with Co-N bonds promotes electrocatalytic N<sub>2</sub> fixation under ambient conditions. *J. Alloys Compd.*, 2022, **902**, 163862.
- 18 X. Yang, Y. Ma, Y. Liu, K. Wang, Y. Wang, M. Liu, X. Qiu, W. Li and J. Li, Defect-induced Ce-doped Bi<sub>2</sub>WO<sub>6</sub> for efficient electrocatalytic N<sub>2</sub> reduction. *ACS Appl. Mater. Interfaces*, 2021, **13**, 19864–19872.
- 19 M. Yang, R. Huo, H. Shen, Q. Xia, J. Qiu, A. W. Robertson, X. Li and Z. Sun, Multiphasic 1T@2H MoSe<sub>2</sub> as a highly efficient catalyst for the N<sub>2</sub> reduction to NH<sub>3</sub>. *ACS Sustain. Chem. Eng.*, 2020, **8**, 2957–2963

- 20 M. I. Ahmed, L. J. Arachchige, Z. Su, D. B. Hibbert, C. Sun and C. Zhao, Nitrogenase-inspired atomically dispersed Fe-S-C linkages for improved electrochemical reduction of dinitrogen to ammonia. *ACS Catal.*, 2022, **12**, 1443–1451.
- 21 Y. Zhang, H. Du, Y. Ma, L. Ji, H. Guo, Z. Tian, H. Chen, H. Huang, G. Cui, A. M. Asiri, F. Qu, L. Chen and X. Sun, Hexagonal boron nitride nanosheet for effective ambient N<sub>2</sub> fixation to NH<sub>3</sub>. *Nano Res.*, 2019, **12**, 919–924.
- 22 J. Zheng, Y. Lyu, M. Qiao, J. P. Veder, R. D. Marco, J. Bradley, R. Wang, Y. Li, A. Huang, S. Jiang and S. Wang, Tuning the electron localization of gold enables the control of nitrogen-to-ammonia fixation. *Angew. Chem. Int. Ed.*, 2019, **58**, 18604–18609.
- 23 H. Su, L. Chen, Y. Chen, R. Si, Y. Wu, X. Wu, Z. Geng, W. Zhang, and J. Zeng, Single atoms of iron on MoS<sub>2</sub> nanosheets for N<sub>2</sub> electroreduction into ammonia. *Angew. Chem., Int. Ed.*, 2020, **59**, 20411–20416.
